# Supplementary material
Source: PubMed Central journal article supplement (PMC5080909)
Supplement: NIHMS822190-supplement-01.pdf [file NIHMS822190-supplement-01.pdf]

| <b>Supplementary Table I.</b> Characteristics of research subjects included in, and those excluded from, the analysis of adipose tissue carotenoid levels in relation to prostate cancer aggressiveness |                            |          |                             |          |                |
|---------------------------------------------------------------------------------------------------------------------------------------------------------------------------------------------------------|----------------------------|----------|-----------------------------|----------|----------------|
|                                                                                                                                                                                                         | <b>Included</b><br>n = 945 |          | <b>Excluded</b><br>n = 1157 |          | <i>P</i> value |
|                                                                                                                                                                                                         | <b>Mean (SD)</b>           |          | <b>Mean (SD)</b>            |          |                |
| Age, years                                                                                                                                                                                              | 63 (8)                     |          | 63 (8)                      |          | 0.38           |
| Energy Intake, kcals/day                                                                                                                                                                                | 2461 (1019)                |          | 2486 (1058)                 |          | 0.59           |
| Dietary Fat Intake, grams/day                                                                                                                                                                           | 95(44)                     |          | 93 (45)                     |          | 0.45           |
| Body Mass Index (BMI), kg/m <sup>2</sup>                                                                                                                                                                | 30 (5)                     |          | 29 (5)                      |          | <0.0001        |
|                                                                                                                                                                                                         | <b>N</b>                   | <b>%</b> | <b>N</b>                    | <b>%</b> |                |
| Race                                                                                                                                                                                                    |                            |          |                             |          |                |
| African American                                                                                                                                                                                        | 361                        | 38       | 662                         | 57       | <0.0001        |
| European American                                                                                                                                                                                       | 584                        | 62       | 495                         | 43       |                |
| Prostate Aggressiveness                                                                                                                                                                                 |                            |          |                             |          |                |
| Low aggressive                                                                                                                                                                                          | 485                        | 51       | 589                         | 51       | 0.45           |
| Intermediate aggressive                                                                                                                                                                                 | 156                        | 16       | 214                         | 18       |                |
| High aggressive                                                                                                                                                                                         | 304                        | 32       | 354                         | 31       |                |
| Study Site                                                                                                                                                                                              |                            |          |                             |          |                |
| North Carolina                                                                                                                                                                                          | 407                        | 43       | 592                         | 51       | 0.0002         |
| Louisiana                                                                                                                                                                                               | 538                        | 57       | 565                         | 49       |                |
| Family History of Prostate Cancer                                                                                                                                                                       |                            |          |                             |          |                |
| No affected 1 <sup>st</sup> degree relative                                                                                                                                                             | 696                        | 74       | 899                         | 78       | 0.03           |
| At least 1 affected 1 <sup>st</sup> degree relative                                                                                                                                                     | 249                        | 26       | 258                         | 22       |                |
| Prostate Cancer Screening History                                                                                                                                                                       |                            |          |                             |          |                |
| 0 screenings                                                                                                                                                                                            | 248                        | 26       | 372                         | 32       | <0.0001        |
| 1-7 screenings                                                                                                                                                                                          | 375                        | 40       | 489                         | 42       |                |
| > 7 screenings                                                                                                                                                                                          | 322                        | 34       | 296                         | 26       |                |
| Comorbidities                                                                                                                                                                                           |                            |          |                             |          |                |
| 0                                                                                                                                                                                                       | 497                        | 53       | 560                         | 49       | 0.11           |
| 1                                                                                                                                                                                                       | 224                        | 24       | 290                         | 25       |                |
| 2                                                                                                                                                                                                       | 105                        | 11       | 164                         | 14       |                |
| ≥ 3                                                                                                                                                                                                     | 119                        | 12       | 143                         | 12       |                |
| Started CaP Treatment at Start of Study                                                                                                                                                                 |                            |          |                             |          |                |
| No                                                                                                                                                                                                      | 95                         | 10       | 147                         | 13       | 0.13           |
| Yes                                                                                                                                                                                                     | 749                        | 79       | 879                         | 76       |                |
| Unknown                                                                                                                                                                                                 | 101                        | 11       | 131                         | 11       |                |
| Education                                                                                                                                                                                               |                            |          |                             |          |                |
| Graduate/professional degree                                                                                                                                                                            | 155                        | 17       | 136                         | 12       | 0.0004         |
| Some college or college graduate                                                                                                                                                                        | 351                        | 37       | 386                         | 33       |                |
| High school grad or voc/tech school                                                                                                                                                                     | 268                        | 28       | 369                         | 32       |                |
| Less than high school education                                                                                                                                                                         | 171                        | 18       | 265                         | 23       |                |

| <b>Supplementary Table I (continued).</b> Characteristics of research subjects included in, and those excluded from, the analysis of adipose tissue carotenoid levels in relation to prostate cancer aggressiveness |                            |    |                             |    |                |
|---------------------------------------------------------------------------------------------------------------------------------------------------------------------------------------------------------------------|----------------------------|----|-----------------------------|----|----------------|
|                                                                                                                                                                                                                     | <b>Included</b><br>n = 945 |    | <b>Excluded</b><br>n = 1157 |    | <i>P</i> value |
|                                                                                                                                                                                                                     | <b>Mean (SD)</b>           |    | <b>Mean (SD)</b>            |    |                |
| <b>Income Level</b>                                                                                                                                                                                                 |                            |    |                             |    |                |
| ≤ \$20, 000                                                                                                                                                                                                         | 156                        | 16 | 262                         | 23 | <0.0001        |
| \$20,001 - \$40,000                                                                                                                                                                                                 | 188                        | 20 | 293                         | 25 |                |
| \$40,001 - \$60,000                                                                                                                                                                                                 | 148                        | 16 | 182                         | 16 |                |
| \$60,001 - \$80,000                                                                                                                                                                                                 | 124                        | 13 | 102                         | 9  |                |
| >\$80,000                                                                                                                                                                                                           | 233                        | 25 | 225                         | 19 |                |
| Unknown                                                                                                                                                                                                             | 96                         | 10 | 93                          | 8  |                |
| <b>Smoking Status</b>                                                                                                                                                                                               |                            |    |                             |    |                |
| Never                                                                                                                                                                                                               | 355                        | 37 | 350                         | 30 | 0.0005         |
| Former smokers                                                                                                                                                                                                      | 471                        | 50 | 614                         | 53 |                |
| Current smokers                                                                                                                                                                                                     | 119                        | 13 | 193                         | 17 |                |
| <b>NSAID Use</b>                                                                                                                                                                                                    |                            |    |                             |    |                |
| No                                                                                                                                                                                                                  | 361                        | 38 | 448                         | 39 | 0.68           |
| Yes                                                                                                                                                                                                                 | 584                        | 62 | 698                         | 61 |                |
| <b>Vitamin E Supplement Use <sup>a</sup></b>                                                                                                                                                                        |                            |    |                             |    |                |
| No                                                                                                                                                                                                                  | 474                        | 50 | 616                         | 53 | 0.16           |
| Yes                                                                                                                                                                                                                 | 471                        | 50 | 541                         | 47 |                |

Abbreviations: CaP – Prostate Cancer; SD – Standard deviation; NSAIDs – Nonsteroidal anti-inflammatory drugs. Prostate cancer aggressiveness defined by a combination of Gleason sum, clinical stage, and PSA level at diagnosis and classified as follows: High aggressive (Gleason sum ≥8 or PSA >20ng/ml or Gleason sum ≥7 AND clinical stage T3 -T4); Low /Intermediate aggressive: all other cases.

<sup>a</sup> Includes single nutrient vitamin E supplement and multivitamins containing vitamin E.

\* Student's *t* test for continuous variables and chi-square tests for categorical variables

| <b>Supplementary Table II (Sensitivity Analyses).</b> Associations between dietary carotenoids and prostate cancer aggressiveness among European Americans and African Americans with data on adipose tissue carotenoid level only (n = 939) |                                                                           |                          |                          |                  |                  |                                                                           |                          |                          |                  |      |
|----------------------------------------------------------------------------------------------------------------------------------------------------------------------------------------------------------------------------------------------|---------------------------------------------------------------------------|--------------------------|--------------------------|------------------|------------------|---------------------------------------------------------------------------|--------------------------|--------------------------|------------------|------|
| European American                                                                                                                                                                                                                            |                                                                           |                          |                          |                  | African American |                                                                           |                          |                          |                  |      |
| Carotenoids                                                                                                                                                                                                                                  | High aggressive/<br>low-intermediate<br>aggressive <sup>a</sup><br>89/492 | OR (95% CI) <sup>b</sup> | OR (95% CI) <sup>c</sup> | P <sup>†</sup>   | Carotenoids      | High aggressive/<br>low-intermediate<br>aggressive <sup>a</sup><br>66/292 | OR (95% CI) <sup>b</sup> | OR (95% CI) <sup>c</sup> | P <sup>†</sup>   |      |
| <b>α-carotene</b>                                                                                                                                                                                                                            |                                                                           |                          |                          |                  |                  |                                                                           |                          |                          |                  |      |
| Dietary μg/day                                                                                                                                                                                                                               |                                                                           |                          |                          |                  |                  |                                                                           |                          |                          |                  |      |
|                                                                                                                                                                                                                                              | 27.20 - 324.13                                                            | 35/173                   | 1.00 (ref)               | 1.00 (ref)       |                  | 11.83 - 262.11                                                            | 24/94                    | 1.00 (ref)               | 1.00 (ref)       |      |
|                                                                                                                                                                                                                                              | 324.14 - 626.76                                                           | 23/157                   | 0.71 (0.40-1.27)         | 0.75 (0.41-1.41) |                  | 262.12 - 585.99                                                           | 17/107                   | 0.60 (0.30-1.20)         | 0.40 (0.18-1.16) |      |
|                                                                                                                                                                                                                                              | 626.77 - 9812                                                             | 31/162                   | 0.89 (0.52-1.52)         | 0.88 (0.48-1.64) | 0.33             | 586.00 - 9558                                                             | 25/91                    | 1.07 (0.57-2.01)         | 0.76 (0.36-1.62) | 0.92 |
| <b>β-carotene</b>                                                                                                                                                                                                                            |                                                                           |                          |                          |                  |                  |                                                                           |                          |                          |                  |      |
| Dietary μg/day                                                                                                                                                                                                                               |                                                                           |                          |                          |                  |                  |                                                                           |                          |                          |                  |      |
|                                                                                                                                                                                                                                              | 194.86 - 2327                                                             | 34/163                   | 1.00 (ref)               | 1.00 (ref)       |                  | 286.48 - 2544                                                             | 12/95                    | 1.00 (ref)               | 1.00 (ref)       |      |
|                                                                                                                                                                                                                                              | >2327 - 4046                                                              | 19/179                   | 0.48 (0.26-1.06)         | 0.50 (0.26-1.04) |                  | >2544 - 5156                                                              | 27/95                    | 2.27 (0.93-4.77)         | 1.64 (0.74-3.64) |      |
|                                                                                                                                                                                                                                              | >4046 - 25124                                                             | 36/150                   | 1.05 (0.62-1.78)         | 1.07 (0.58-1.96) | 0.44             | >5156 - 32901                                                             | 27/102                   | 2.03 (0.97-4.24)         | 1.81 (0.77-4.23) | 0.25 |
| Supplement μg/day                                                                                                                                                                                                                            |                                                                           |                          |                          |                  |                  |                                                                           |                          |                          |                  |      |
|                                                                                                                                                                                                                                              | non-users                                                                 | 48/277                   | 1.00 (ref)               | 1.00 (ref)       |                  | non-users                                                                 | 50/211                   | 1.00 (ref)               | 1.00 (ref)       |      |
|                                                                                                                                                                                                                                              | 63.00 - 600.00                                                            | 33/181                   | 1.09 (0.67-1.77)         | 1.35 (0.80-2.28) |                  | 63.00 - 590.00                                                            | 7/25                     | 1.35 (0.55-3.35)         | 1.24 (0.46-3.38) |      |
|                                                                                                                                                                                                                                              | 600.01 - 16470                                                            | 8/34                     | 1.36 (0.59-3.15)         | 1.73 (0.70-4.24) | 0.15             | 590.01 - 15600                                                            | 9/56                     | 0.69 (0.32-1.50)         | 0.87 (0.38-1.97) | 0.83 |
| Diet + supplement μg/day                                                                                                                                                                                                                     |                                                                           |                          |                          |                  |                  |                                                                           |                          |                          |                  |      |
|                                                                                                                                                                                                                                              | 346.80 - 2566                                                             | 31/162                   | 1.00 (ref)               | 1.00 (ref)       |                  | 286.48 - 2773                                                             | 16/94                    | 1.00 (ref)               | 1.00 (ref)       |      |
|                                                                                                                                                                                                                                              | >2566.42 - 4458                                                           | 24/179                   | 0.86 (0.38-1.21)         | 0.71 (0.38-1.33) |                  | >2773 - 5405                                                              | 25/95                    | 1.54 (0.77-3.09)         | 1.15 (0.54-2.43) |      |
|                                                                                                                                                                                                                                              | >4458 - 25512                                                             | 34/151                   | 1.08 (0.62-1.85)         | 1.10 (0.60-2.04) | 0.50             | >5405 - 32901                                                             | 25/103                   | 1.39 (0.70-2.77)         | 1.20 (0.54-2.68) | 0.69 |
| <b>β-cryptoxanthin</b>                                                                                                                                                                                                                       |                                                                           |                          |                          |                  |                  |                                                                           |                          |                          |                  |      |
| Dietary μg/day                                                                                                                                                                                                                               |                                                                           |                          |                          |                  |                  |                                                                           |                          |                          |                  |      |
|                                                                                                                                                                                                                                              | 6.04 - 86.14                                                              | 19/170                   | 1.00 (ref)               | 1.00 (ref)       |                  | 3.53 - 116.43                                                             | 25/101                   | 1.00 (ref)               | 1.00 (ref)       |      |
|                                                                                                                                                                                                                                              | 86.15 - 180.62                                                            | 38/159                   | 2.10 (0.89-3.82)         | 1.94 (0.64-3.64) |                  | 116.44 - 243.34                                                           | 22/102                   | 0.88 (0.46-1.66)         | 0.75 (0.37-1.53) |      |
|                                                                                                                                                                                                                                              | 180.63 - 1082                                                             | 32/163                   | 1.70 (0.92-3.15)         | 1.57 (0.80-3.07) | 0.38             | 243.34 - 1594                                                             | 19/89                    | 0.87 (0.45-1.70)         | 0.59 (0.27-1.28) | 0.19 |

| <b>Supplementary Table II (Sensitivity Analyses; continued).</b> Associations between dietary carotenoids and prostate cancer aggressiveness among European Americans and African Americans with data on adipose tissue carotenoid level only (n = 939) |                                                                           |                          |                          |                |                  |                                                                           |                          |                          |                |
|---------------------------------------------------------------------------------------------------------------------------------------------------------------------------------------------------------------------------------------------------------|---------------------------------------------------------------------------|--------------------------|--------------------------|----------------|------------------|---------------------------------------------------------------------------|--------------------------|--------------------------|----------------|
| European American                                                                                                                                                                                                                                       |                                                                           |                          |                          |                | African American |                                                                           |                          |                          |                |
| Carotenoids                                                                                                                                                                                                                                             | High aggressive/<br>low-intermediate<br>aggressive <sup>a</sup><br>89/492 | OR (95% CI) <sup>b</sup> | OR (95% CI) <sup>c</sup> | P <sup>†</sup> | Carotenoids      | High aggressive/<br>low-intermediate<br>aggressive <sup>a</sup><br>66/292 | OR (95% CI) <sup>b</sup> | OR (95% CI) <sup>c</sup> | P <sup>†</sup> |
| <b>Lutein + Zeaxanthin</b>                                                                                                                                                                                                                              |                                                                           |                          |                          |                |                  |                                                                           |                          |                          |                |
| Dietary $\mu\text{g/day}$                                                                                                                                                                                                                               |                                                                           |                          |                          |                |                  |                                                                           |                          |                          |                |
| 289.67 - 1830                                                                                                                                                                                                                                           | 30/166                                                                    | 1.00 (ref)               | 1.00 (ref)               |                | 112.25 - 2299    | 17/103                                                                    | 1.00 (ref)               | 1.00 (ref)               |                |
| >1830 - 3253                                                                                                                                                                                                                                            | 24/166                                                                    | 0.72 (0.40-1.30)         | 0.82 (0.43-1.56)         |                | >2299 - 4408     | 24/90                                                                     | 1.57 (0.79-3.12)         | 1.11 (0.52-2.37)         |                |
| >3253 - 30165                                                                                                                                                                                                                                           | 35/160                                                                    | 1.20 (0.70-2.07)         | 1.34 (0.71-2.50)         | 0.21           | >4408 - 36608    | 25/99                                                                     | 1.53 (0.78-3.02)         | 1.35 (0.63-2.90)         | 0.42           |
| Supplement (lutein) <sup>e</sup>                                                                                                                                                                                                                        |                                                                           |                          |                          |                |                  |                                                                           |                          |                          |                |
| non-users                                                                                                                                                                                                                                               | 59/325                                                                    | 1.00 (ref)               | 1.00 (ref)               |                | non-users        | 55/248                                                                    | 1.00 (ref)               | 1.00 (ref)               |                |
| users                                                                                                                                                                                                                                                   | 30/167                                                                    | 1.04 (0.64-1.69)         | 0.90 (0.54-1.52)         |                | users            | 11/44                                                                     | 0.89 (0.43-1.83)         | 0.69 (0.32-1.51)         |                |
| Diet + supplement $\mu\text{g/day}$                                                                                                                                                                                                                     |                                                                           |                          |                          |                |                  |                                                                           |                          |                          |                |
| 289.67 - 1907                                                                                                                                                                                                                                           | 28/168                                                                    | 1.00 (ref)               | 1.00 (ref)               |                | 112.25 - 2309    | 17/102                                                                    | 1.00 (ref)               | 1.00 (ref)               |                |
| >1907 - 3318                                                                                                                                                                                                                                            | 28/164                                                                    | 0.91 (0.51-1.63)         | 1.06 (0.57-1.99)         |                | >2309 - 4461     | 24/91                                                                     | 1.53 (0.77-3.04)         | 1.10 (0.51-2.35)         |                |
| >3318 - 31665                                                                                                                                                                                                                                           | 33/160                                                                    | 1.23 (0.70-2.15)         | 1.40 (0.73-2.66)         | 0.26           | >4461 - 37558    | 25/99                                                                     | 1.52 (0.77-2.99)         | 1.35 (0.63-2.88)         | 0.42           |
| <b>Lycopene</b>                                                                                                                                                                                                                                         |                                                                           |                          |                          |                |                  |                                                                           |                          |                          |                |
| Dietary $\mu\text{g/day}$                                                                                                                                                                                                                               |                                                                           |                          |                          |                |                  |                                                                           |                          |                          |                |
| 344.77 - 3605                                                                                                                                                                                                                                           | 34/162                                                                    | 1.00 (ref)               | 1.00 (ref)               |                | 21.52 - 2390     | 15/97                                                                     | 1.00 (ref)               | 1.00 (ref)               |                |
| >3605 - 6299                                                                                                                                                                                                                                            | 28/154                                                                    | 0.87 (0.50-1.52)         | 0.83 (0.46-1.51)         |                | >2390 - 5003     | 23/87                                                                     | 1.82 (0.89-3.74)         | 1.69 (0.76-3.75)         |                |
| >6299 - 100250                                                                                                                                                                                                                                          | 27/176                                                                    | 0.81 (0.46-1.41)         | 0.63 (0.32-1.23)         | 0.18           | >5003 - 85677    | 26/108                                                                    | 1.72 (0.85-3.48)         | 1.36 (0.59-3.01)         | 0.79           |
| Supplement $\mu\text{g/day}$                                                                                                                                                                                                                            |                                                                           |                          |                          |                |                  |                                                                           |                          |                          |                |
| non-users                                                                                                                                                                                                                                               | 54/243                                                                    | 1.00 (ref)               | 1.00 (ref)               |                | non-users        | 42/205                                                                    | 1.00 (ref)               | 1.00 (ref)               |                |
| 64.28 - 250.00                                                                                                                                                                                                                                          | 13/114                                                                    | 1.40 (0.38-5.15)         | 1.46 (0.38-5.63)         |                | 64.28 - 250.00   | 14/40                                                                     | 1.78 (0.60-4.76)         | 1.94 (0.52-6.32)         |                |
| 250.01 - 5000                                                                                                                                                                                                                                           | 22/135                                                                    | 0.86 (0.51-1.47)         | 1.00 (0.57-1.76)         | 0.95           | 250.01 - 1000    | 10/47                                                                     | 0.99 (0.46-2.10)         | 1.10 (0.49-2.45)         | 0.70           |
| Diet + supplement $\mu\text{g/day}$                                                                                                                                                                                                                     |                                                                           |                          |                          |                |                  |                                                                           |                          |                          |                |
| 344.77 - 3649                                                                                                                                                                                                                                           | 33/165                                                                    | 1.00 (ref)               | 1.00 (ref)               |                | 21.52 - 2448     | 16/98                                                                     | 1.00 (ref)               | 1.00 (ref)               |                |
| >3649 - 6352                                                                                                                                                                                                                                            | 29/150                                                                    | 0.98 (0.56-1.70)         | 0.96 (0.53-1.74)         |                | >2448 - 5064     | 22/87                                                                     | 1.72 (0.84-3.51)         | 1.56 (0.71-3.44)         |                |
| >6352 - 100550                                                                                                                                                                                                                                          | 27/177                                                                    | 0.85 (0.49-1.49)         | 0.69 (0.35-1.37)         | 0.26           | >5064 - 85677    | 26/107                                                                    | 1.67 (0.84-3.34)         | 1.31 (0.58-2.96)         | 0.79           |

<sup>a</sup> Adjusted for age  
<sup>b</sup> Additional adjustment for PSA screening history, BMI, smoking status, education, income, NSAIDs use, total dietary fat intake, and study site  
<sup>c</sup> First value represents age-adjusted trend p-values and the second is the multivariable adjusted trend p-value  
<sup>d</sup> Categorized into two levels because limited variability in dose did not allow for creation of meaningful tertile categories  
<sup>†</sup> Multivariable-adjusted trend p-values
